# Supplementary material for: The Interactions Between Precipitation, Vegetation and Dust Emission Over Semi-Arid Mongolia
Source: Copernicus journal article supplement (doi:10.5194/acp-2017-83), 2017-03-09
Supplement: Supplementary file [file acp-2017-83-AC5-supplement.pdf]

Figure 7 (a, b, c, d, e, f, g, h) Relationship between dust storm days and growth season vegetation index ( $NDVI_{GS}$ ) in Gobi region during 2000-2009 using the World Meteorological Observation (WMO) data

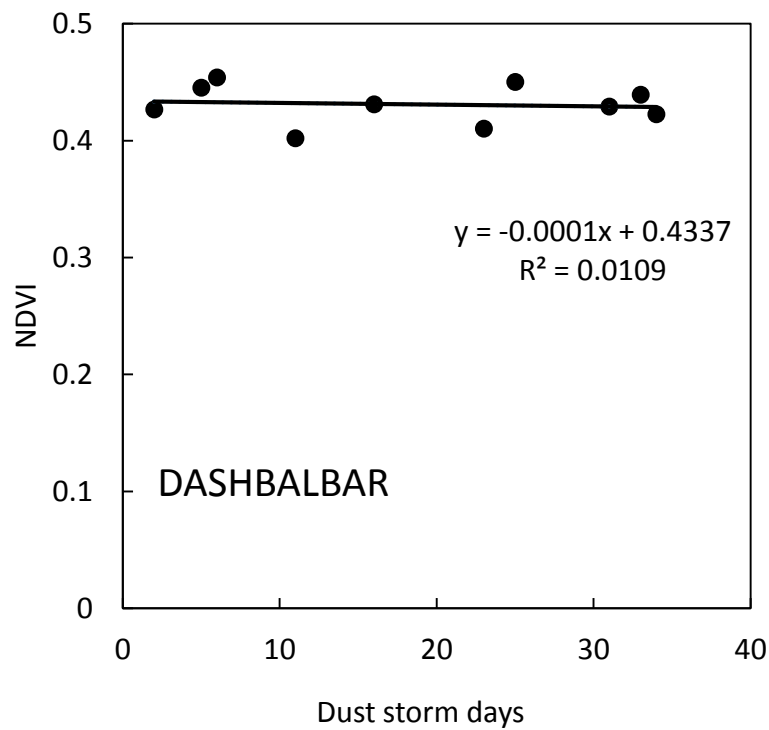

(a) Dashbalbar

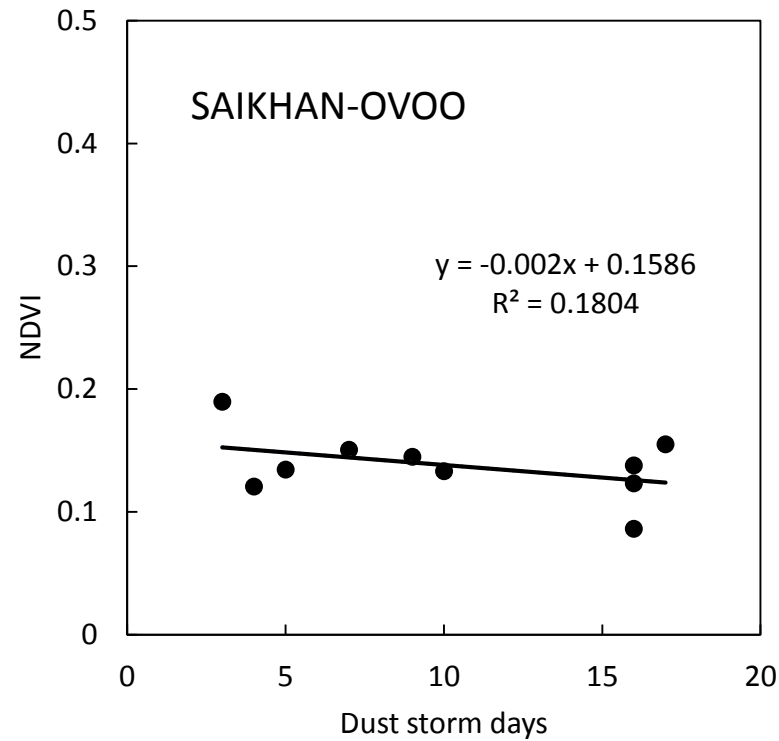

(b) Saikhan-Ovoo

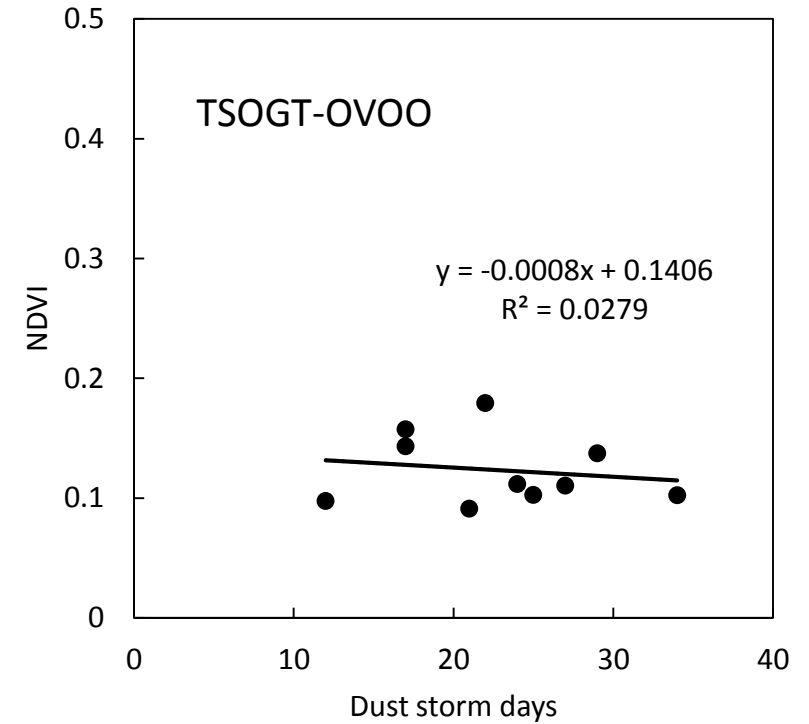

(c) Tsogt-Ovoo

Figure 7 (a, b, c, d, e, f, g, h) Relationship between dust storm days and growth season vegetation index (NDVI<sub>GS</sub>) in Gobi region during 2000-2009 using the World Meteorological Observation (WMO) data

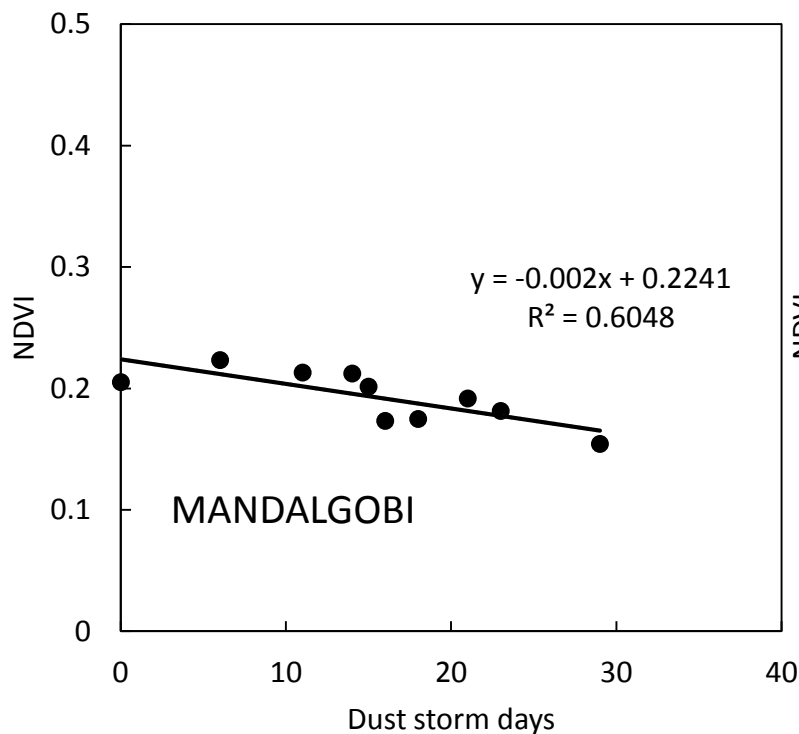

(d) Mandalgobi

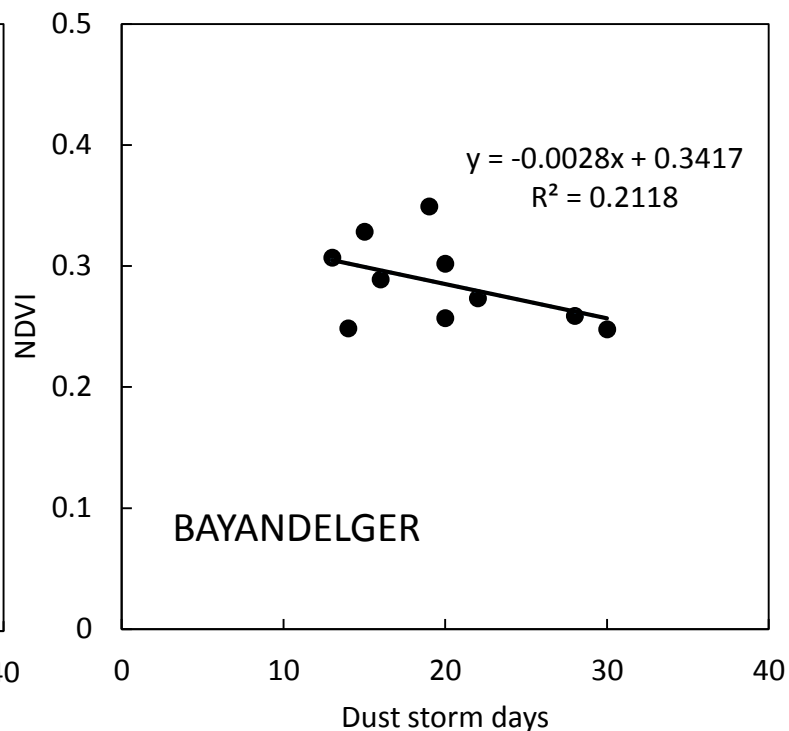

(e) Bayandelger

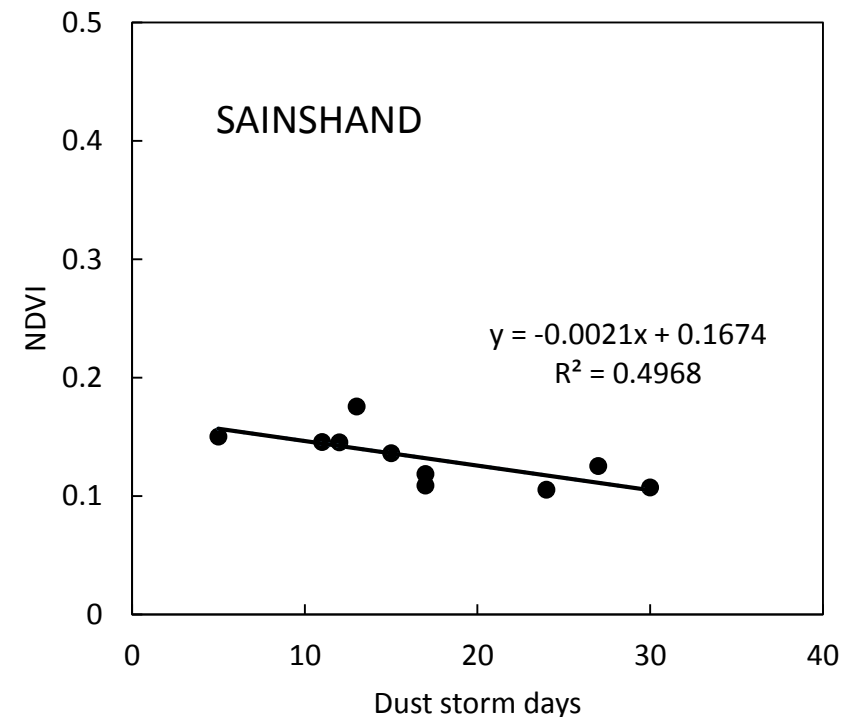

(f) Sainshand

Figure 7 (a, b, c, d, e, f, g, h) Relationship between dust storm days and growth season vegetation index (NDVI<sub>GS</sub>) in Gobi region during 2000-2009 using the World Meteorological Observation (WMO) data

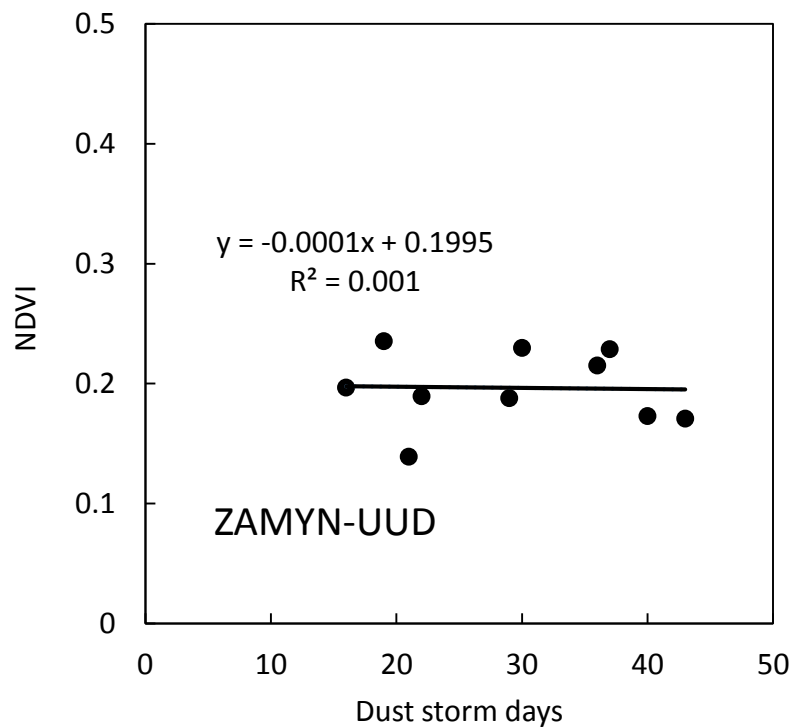

(g) Zamin-Uud

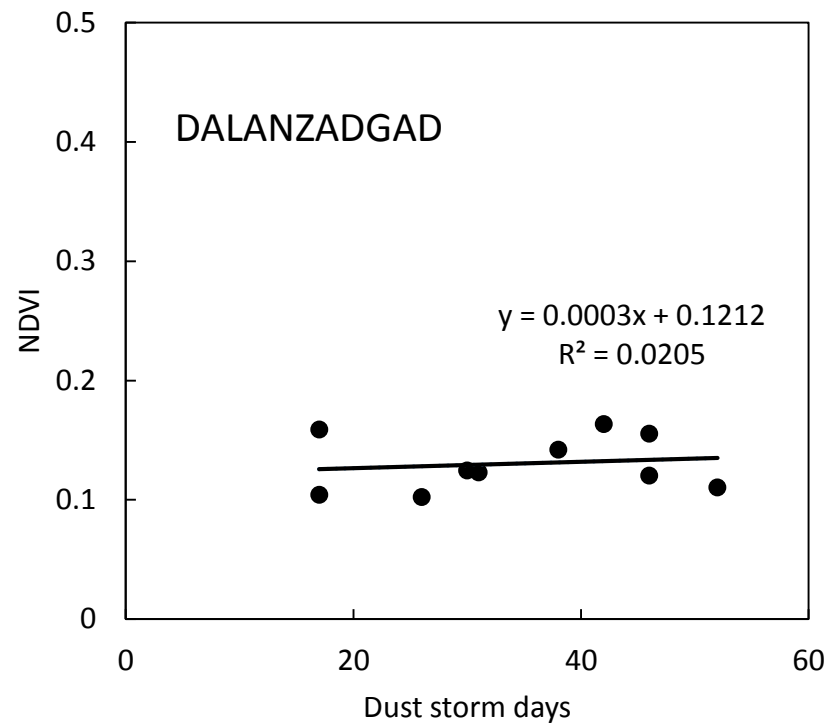

(h) Dalanzadgad
